# Supplementary material
Source: PubMed Central journal article supplement (PMC5319475)
Supplement: DC160173SupplementaryData.pdf [file DC160173SupplementaryData.pdf]

SUPPLEMENTARY DATA

Title: **Circulating modified metabolites and a risk of ESRD in patients with Type 1 Diabetes and Chronic Kidney Disease**

Running title: **Modified metabolites and risk of ESRD in diabetes**

Niewczas Monika A<sup>1,2</sup>, Mathew Anna V<sup>3</sup> Croall Stephanie<sup>1</sup>, Byun Jaeman<sup>3</sup>, Major Melissa<sup>1</sup>,  
Sabisetti Venkatta S<sup>4</sup>, Smiles Adam<sup>1</sup>, Bonventre Joseph V<sup>2,4</sup>, Pennathur Subramaniam<sup>3</sup>,  
Krolewski Andrzej S<sup>1,2</sup>

<sup>1</sup> Research Division, Joslin Diabetes Center, Boston, MA, USA

<sup>2</sup> Department of Medicine, Harvard Medical School, Boston, MA, USA

<sup>3</sup> Division of Nephrology, Department of Internal Medicine, University of Michigan, Ann Arbor, Michigan, USA

<sup>4</sup> Renal Division, Brigham and Women's Hospital, Boston, MA, USA

SUPPLEMENTARY DATA

**Supplementary Table 1.** Metabolite associations with eGFR slope in subjects with T1D, proteinuria and CKD3 (main study) in a global profiling of amino acids, purine and pyrimidine metabolites and their derivatives. Metabolites are sorted by biochemical class and presented further in an alphabetical order. Metabolites significantly associated with eGFR slope are marked in bold. r - non parametric correlation coefficient, q value - significance adjusted for multiple testing with positive false discovery rate. PC1\_all - principal component considering all well detected metabolites, PC1\_9 considers only 9 significant modified metabolites identified in the global matrix analysis.

| metabolite name                    | biochemical subclass                          | correlation with eGFR slope | nominal significance | significance adjusted for multiple testing | Principal component - PC1_all | Principal component - PC1_9 |
|------------------------------------|-----------------------------------------------|-----------------------------|----------------------|--------------------------------------------|-------------------------------|-----------------------------|
|                                    |                                               | r                           | p value              | q value                                    | loading                       | loading                     |
| <b>AMINO ACIDS AND DERIVATIVES</b> |                                               |                             |                      |                                            |                               |                             |
| alanine                            | Alanine and aspartate metabolism              | -0.016                      | 8.4E-01              | 8.4E-01                                    | 0.081                         |                             |
| asparagine                         | Alanine and aspartate metabolism              | 0.053                       | 5.1E-01              | 5.1E-01                                    | 0.096                         |                             |
| aspartate                          | Alanine and aspartate metabolism              | -0.150                      | 5.9E-02              | 1.2E-01                                    | 0.076                         |                             |
| beta-alanine                       | Alanine and aspartate metabolism              | -0.057                      | 4.8E-01              | 4.8E-01                                    | 0.062                         |                             |
| <b>N-acetylalanine</b>             | Alanine and aspartate metabolism              | -0.292                      | 2.0E-04              | <b>2.0E-03</b>                             | 0.181                         | 0.350                       |
| N-acetylaspartate (NAA)            | Alanine and aspartate metabolism              | -0.086                      | 2.8E-01              | 2.8E-01                                    | 0.101                         |                             |
| N-acetyl-beta-alanine              | Alanine and aspartate metabolism              | -0.176                      | 2.7E-02              | 8.0E-02                                    | 0.057                         |                             |
| 2-aminobutyrate                    | Butanoate metabolism                          | 0.128                       | 1.1E-01              | 1.6E-01                                    | -0.010                        |                             |
| creatine                           | Creatine metabolism                           | -0.045                      | 5.7E-01              | 5.7E-01                                    | -0.058                        |                             |
| <b>creatinine</b>                  | Creatine metabolism                           | -0.265                      | 7.8E-04              | <b>5.2E-03</b>                             | 0.198                         |                             |
| 2-hydroxybutyrate (AHB)            | Cysteine, methionine, SAM, taurine metabolism | -0.013                      | 8.7E-01              | 8.7E-01                                    | -0.007                        |                             |
| cysteine                           | Cysteine, methionine, SAM, taurine metabolism | 0.005                       | 9.5E-01              | 9.5E-01                                    | 0.067                         |                             |
| methionine                         | Cysteine, methionine, SAM, taurine metabolism | 0.043                       | 5.9E-01              | 5.9E-01                                    | 0.067                         |                             |
| N-acetylmethionine                 | Cysteine, methionine, SAM, taurine metabolism | -0.172                      | 3.1E-02              | 8.2E-02                                    | 0.016                         |                             |
| N-formylmethionine                 | Cysteine, methionine, SAM, taurine metabolism | -0.149                      | 6.2E-02              | 1.2E-01                                    | 0.127                         |                             |
| S-methylcysteine                   | Cysteine, methionine, SAM, taurine metabolism | 0.064                       | 4.2E-01              | 4.2E-01                                    | 0.016                         |                             |
| N-acetylcarnosine                  | Dipeptide derivative                          | -0.116                      | 1.5E-01              | 2.0E-01                                    | 0.147                         |                             |
| glutamate                          | Glutamate metabolism                          | -0.090                      | 2.6E-01              | 2.7E-01                                    | 0.039                         |                             |
| glutamine                          | Glutamate metabolism                          | 0.070                       | 3.9E-01              | 3.9E-01                                    | 0.047                         |                             |
| pyroglutamine                      | Glutamate metabolism                          | 0.098                       | 2.2E-01              | 2.4E-01                                    | 0.122                         |                             |
| 5-oxoproline                       | Glutathione metabolism                        | -0.043                      | 5.9E-01              | 5.9E-01                                    | 0.000                         |                             |
| beta-hydroxypropyruvate            | Glycine, serine and threonine metabolism      | -0.017                      | 8.3E-01              | 8.3E-01                                    | 0.047                         |                             |
| betaine                            | Glycine, serine and threonine metabolism      | 0.145                       | 7.0E-02              | 1.2E-01                                    | -0.056                        |                             |
| dimethylglycine                    | Glycine, serine and threonine metabolism      | -0.030                      | 7.1E-01              | 7.1E-01                                    | 0.105                         |                             |
| glycine                            | Glycine, serine and threonine metabolism      | -0.021                      | 8.0E-01              | 8.0E-01                                    | 0.061                         |                             |
| N-acetylglycine                    | Glycine, serine and threonine metabolism      | -0.164                      | 3.9E-02              | 9.9E-02                                    | 0.064                         |                             |

SUPPLEMENTARY DATA

|                                                 |                                             |        |         |                |        |       |
|-------------------------------------------------|---------------------------------------------|--------|---------|----------------|--------|-------|
| <b>N-acetylserine</b>                           | Glycine, serine and threonine metabolism    | -0.291 | 2.1E-04 | <b>2.0E-03</b> | 0.177  | 0.317 |
| <b>N-acetylthreonine</b>                        | Glycine, serine and threonine metabolism    | -0.342 | 1.1E-05 | <b>1.4E-04</b> | 0.192  | 0.359 |
| sarcosine (N-Methylglycine)                     | Glycine, serine and threonine metabolism    | -0.001 | 9.9E-01 | 9.9E-01        | -0.015 |       |
| serine                                          | Glycine, serine and threonine metabolism    | -0.069 | 3.9E-01 | 3.9E-01        | 0.057  |       |
| threonine                                       | Glycine, serine and threonine metabolism    | 0.105  | 1.9E-01 | 2.2E-01        | 0.056  |       |
| 1-methylhistidine                               | Histidine metabolism                        | -0.077 | 3.4E-01 | 3.4E-01        | 0.093  |       |
| 3-methylhistidine                               | Histidine metabolism                        | -0.204 | 1.0E-02 | 5.2E-02        | 0.115  |       |
| histidine                                       | Histidine metabolism                        | -0.085 | 2.9E-01 | 2.9E-01        | 0.080  |       |
| 2-aminoadipate                                  | Lysine metabolism                           | 0.001  | 9.9E-01 | 9.9E-01        | 0.030  |       |
| glutarate (pentanedioate)                       | Lysine metabolism                           | 0.011  | 9.0E-01 | 9.0E-01        | 0.004  |       |
| lysine                                          | Lysine metabolism                           | -0.015 | 8.5E-01 | 8.5E-01        | 0.010  |       |
| <b>N6-acetyllysine</b>                          | Lysine metabolism                           | -0.261 | 9.4E-04 | <b>5.6E-03</b> | 0.124  | 0.225 |
| pipecolate                                      | Lysine metabolism                           | -0.031 | 7.0E-01 | 7.0E-01        | 0.024  |       |
| 3-(4-hydroxyphenyl)lactate                      | Phenylalanine & tyrosine metabolism         | 0.141  | 7.7E-02 | 1.3E-01        | 0.047  |       |
| 3-methoxytyrosine                               | Phenylalanine & tyrosine metabolism         | 0.018  | 8.2E-01 | 8.2E-01        | 0.056  |       |
| 4-hydroxyphenylacetate                          | Phenylalanine & tyrosine metabolism         | -0.157 | 4.9E-02 | 1.1E-01        | 0.131  |       |
| 5-hydroxymethyl-2-furoic acid                   | Phenylalanine & tyrosine metabolism         | -0.044 | 5.8E-01 | 5.8E-01        | 0.061  |       |
| o-cresol sulfate                                | Phenylalanine & tyrosine metabolism         | 0.000  | 1.0E+00 | 1.0E+00        | 0.040  |       |
| <b>O-sulfo-L-tyrosine</b>                       | Phenylalanine & tyrosine metabolism         | -0.367 | 2.1E-06 | <b>4.6E-05</b> | 0.199  | 0.369 |
| p-cresol sulfate                                | Phenylalanine & tyrosine metabolism         | -0.106 | 1.9E-01 | 2.2E-01        | 0.134  |       |
| phenethylamine (isobar with 1-phenylethylamine) | Phenylalanine & tyrosine metabolism         | 0.103  | 2.0E-01 | 2.2E-01        | 0.035  |       |
| <b>phenol sulfate</b>                           | Phenylalanine & tyrosine metabolism         | -0.267 | 7.0E-04 | <b>5.1E-03</b> | 0.128  | 0.240 |
| phenylacetate                                   | Phenylalanine & tyrosine metabolism         | 0.115  | 1.5E-01 | 2.0E-01        | 0.048  |       |
| phenylacetylglutamine                           | Phenylalanine & tyrosine metabolism         | -0.193 | 1.5E-02 | 6.3E-02        | 0.151  |       |
| phenylalanine                                   | Phenylalanine & tyrosine metabolism         | -0.099 | 2.2E-01 | 2.4E-01        | 0.067  |       |
| phenyllactate (PLA)                             | Phenylalanine & tyrosine metabolism         | 0.037  | 6.4E-01 | 6.4E-01        | 0.066  |       |
| tyrosine                                        | Phenylalanine & tyrosine metabolism         | 0.066  | 4.1E-01 | 4.1E-01        | 0.033  |       |
| 3-indoxyl sulfate                               | Tryptophan metabolism                       | -0.146 | 6.7E-02 | 1.2E-01        | 0.133  |       |
| <b>C-glycosyltryptophan</b>                     | Tryptophan metabolism                       | -0.447 | 4.0E-09 | <b>2.6E-07</b> | 0.198  | 0.385 |
| indoleacetate                                   | Tryptophan metabolism                       | -0.136 | 8.8E-02 | 1.4E-01        | 0.105  |       |
| indolelactate                                   | Tryptophan metabolism                       | -0.174 | 2.9E-02 | 8.2E-02        | 0.145  |       |
| indolepropionate                                | Tryptophan metabolism                       | 0.150  | 5.9E-02 | 1.2E-01        | -0.009 |       |
| kynurenate                                      | Tryptophan metabolism                       | -0.039 | 6.3E-01 | 6.3E-01        | 0.082  |       |
| kynurenine                                      | Tryptophan metabolism                       | -0.172 | 3.1E-02 | 8.2E-02        | 0.159  |       |
| serotonin (5HT)                                 | Tryptophan metabolism                       | -0.074 | 3.5E-01 | 3.5E-01        | 0.015  |       |
| tryptophan                                      | Tryptophan metabolism                       | 0.201  | 1.1E-02 | 5.3E-02        | -0.032 |       |
| tryptophan betaine                              | Tryptophan metabolism                       | 0.129  | 1.1E-01 | 1.6E-01        | -0.020 |       |
| arginine                                        | Urea cycle; arginine-, proline-, metabolism | -0.024 | 7.7E-01 | 7.7E-01        | 0.055  |       |
| citrulline                                      | Urea cycle; arginine-, proline-, metabolism | -0.127 | 1.1E-01 | 1.6E-01        | 0.120  |       |
| dimethylarginine (SDMA + ADMA)                  | Urea cycle; arginine-, proline-, metabolism | -0.189 | 1.7E-02 | 6.7E-02        | 0.115  |       |
| homocitrulline                                  | Urea cycle; arginine-, proline-, metabolism | -0.183 | 2.1E-02 | 7.3E-02        | 0.162  |       |
| N-methyl proline                                | Urea cycle; arginine-, proline-, metabolism | -0.112 | 1.6E-01 | 2.1E-01        | 0.060  |       |
| ornithine                                       | Urea cycle; arginine-, proline-, metabolism | 0.004  | 9.6E-01 | 9.6E-01        | 0.028  |       |

## SUPPLEMENTARY DATA

|                                          |                                             |        |         |                |        |       |
|------------------------------------------|---------------------------------------------|--------|---------|----------------|--------|-------|
| proline                                  | Urea cycle; arginine-, proline-, metabolism | -0.045 | 5.8E-01 | 5.8E-01        | 0.089  |       |
| trans-4-hydroxyproline                   | Urea cycle; arginine-, proline-, metabolism | -0.099 | 2.2E-01 | 2.4E-01        | 0.079  |       |
| urea                                     | Urea cycle; arginine-, proline-, metabolism | -0.129 | 1.1E-01 | 1.6E-01        | 0.169  |       |
| 2-hydroxy-3-methylvalerate               | Valine, leucine and isoleucine metabolism   | 0.029  | 7.1E-01 | 7.1E-01        | -0.010 |       |
| 3-hydroxy-2-ethylpropionate              | Valine, leucine and isoleucine metabolism   | 0.020  | 8.0E-01 | 8.0E-01        | 0.093  |       |
| 3-hydroxyisobutyrate                     | Valine, leucine and isoleucine metabolism   | 0.026  | 7.5E-01 | 7.5E-01        | 0.062  |       |
| 3-methyl-2-oxobutyrate                   | Valine, leucine and isoleucine metabolism   | 0.138  | 8.4E-02 | 1.4E-01        | 0.003  |       |
| 3-methyl-2-oxovalerate                   | Valine, leucine and isoleucine metabolism   | 0.096  | 2.3E-01 | 2.4E-01        | 0.026  |       |
| 4-methyl-2-oxopentanoate                 | Valine, leucine and isoleucine metabolism   | 0.160  | 4.5E-02 | 1.1E-01        | 0.011  |       |
| alpha-hydroxyisocaproate                 | Valine, leucine and isoleucine metabolism   | 0.028  | 7.2E-01 | 7.2E-01        | 0.006  |       |
| alpha-hydroxyisovalerate                 | Valine, leucine and isoleucine metabolism   | 0.035  | 6.7E-01 | 6.7E-01        | -0.036 |       |
| beta-hydroxyisovalerate                  | Valine, leucine and isoleucine metabolism   | -0.147 | 6.5E-02 | 1.2E-01        | 0.065  |       |
| isoleucine                               | Valine, leucine and isoleucine metabolism   | -0.149 | 6.1E-02 | 1.2E-01        | 0.065  |       |
| isovalerylcarnitine                      | Valine, leucine and isoleucine metabolism   | -0.052 | 5.2E-01 | 5.2E-01        | 0.046  |       |
| leucine                                  | Valine, leucine and isoleucine metabolism   | -0.110 | 1.7E-01 | 2.1E-01        | 0.053  |       |
| valine                                   | Valine, leucine and isoleucine metabolism   | -0.002 | 9.8E-01 | 9.8E-01        | 0.031  |       |
| <b>PURINE AND PYRIMIDINE METABOLITES</b> |                                             |        |         |                |        |       |
| 1,3,7-trimethylurate                     | Purine metabolism                           | 0.103  | 2.0E-01 | 2.2E-01        | 0.034  |       |
| 1,3-dimethylurate                        | Purine metabolism                           | 0.090  | 2.6E-01 | 2.7E-01        | 0.028  |       |
| 1,7-dimethylurate                        | Purine metabolism                           | 0.134  | 9.3E-02 | 1.5E-01        | 0.019  |       |
| 1-methylurate                            | Purine metabolism                           | 0.001  | 9.9E-01 | 9.9E-01        | 0.080  |       |
| 1-methylxanthine                         | Purine metabolism                           | 0.177  | 2.6E-02 | 8.0E-02        | 0.003  |       |
| 3-methylxanthine                         | Purine metabolism                           | 0.027  | 7.3E-01 | 7.3E-01        | 0.078  |       |
| 7-methylguanine                          | Purine metabolism                           | -0.070 | 3.8E-01 | 3.8E-01        | 0.044  |       |
| 7-methylxanthine                         | Purine metabolism                           | 0.084  | 2.9E-01 | 2.9E-01        | 0.048  |       |
| allantoin                                | Purine metabolism                           | -0.110 | 1.7E-01 | 2.1E-01        | 0.132  |       |
| hypoxanthine                             | Purine metabolism                           | -0.111 | 1.6E-01 | 2.1E-01        | 0.016  |       |
| inosine                                  | Purine metabolism                           | -0.124 | 1.2E-01 | 1.7E-01        | 0.021  |       |
| N1-methyladenosine                       | Purine metabolism                           | -0.157 | 4.9E-02 | 1.1E-01        | 0.077  |       |
| N2,N2-dimethylguanosine                  | Purine metabolism                           | -0.070 | 3.8E-01 | 3.8E-01        | 0.118  |       |
| <b>N6-carbamoylthreonyl</b> adenosine    | Purine metabolism                           | -0.373 | 1.4E-06 | <b>4.6E-05</b> | 0.169  | 0.344 |
| urate                                    | Purine metabolism                           | -0.152 | 5.7E-02 | 1.2E-01        | 0.147  |       |
| xanthine                                 | Purine metabolism                           | -0.008 | 9.2E-01 | 9.2E-01        | 0.064  |       |
| 3-aminoisobutyrate                       | Pyrimidine metabolism                       | -0.024 | 7.6E-01 | 7.6E-01        | 0.100  |       |
| 5,6-dihydrouracil                        | Pyrimidine metabolism                       | -0.151 | 5.8E-02 | 1.2E-01        | 0.045  |       |
| 5-methyluridine (ribothymidine)          | Pyrimidine metabolism                       | 0.116  | 1.5E-01 | 2.0E-01        | 0.044  |       |
| dihydroorotate                           | Pyrimidine metabolism                       | -0.096 | 2.3E-01 | 2.4E-01        | 0.076  |       |
| <b>pseudouridine</b>                     | Pyrimidine metabolism                       | -0.349 | 7.1E-06 | <b>1.2E-04</b> | 0.201  | 0.372 |
| uracil                                   | Pyrimidine metabolism                       | -0.062 | 4.4E-01 | 4.4E-01        | 0.030  |       |
| uridine                                  | Pyrimidine metabolism                       | 0.003  | 9.7E-01 | 9.7E-01        | -0.020 |       |

SUPPLEMENTARY DATA

**Supplementary Table S2.** Associations of the metabolites with the nephropathy risk in our study that were reported formerly in the independent cohort studies.

| name                          | baseline     | eGFR         | Hazard ratio<br>HR (95%CI) | Reference<br>no |
|-------------------------------|--------------|--------------|----------------------------|-----------------|
|                               | eGFR         | slope        |                            |                 |
|                               | r            | r            |                            |                 |
| C-mannosyltryptophan*         | <b>-0.48</b> | <b>-0.45</b> | <b>3.39 (2.22, 5.16)</b>   | 1,2             |
| O-sulfo-L-tyrosine            | <b>-0.46</b> | <b>-0.37</b> | <b>4.13 (2.66, 6.40)</b>   | 1               |
| Pseudouridine                 | <b>-0.48</b> | <b>-0.35</b> | <b>3.37 (2.20, 5.16)</b>   | 1,2             |
| Trans-4-hydroxyproline        | -0.09        | -0.10        | 1.13 (0.93, 1.38)          | 3               |
| Creatine                      | 0.21         | -0.05        | 0.98 (0.78, 1.22)          | 3               |
| Dimethylarginine <sup>†</sup> | -0.18        | -0.19        | 1.17 (0.95, 1.43)          | 3               |
| Uracil                        | 0.02         | -0.06        | 1.05 (0.86, 1.30)          | 3, 5            |
| Citrulline                    | <b>-0.30</b> | -0.13        | <b>1.34 (1.07, 1.68)</b>   | 4               |
| Kynurenine                    | <b>-0.26</b> | -0.17        | <b>1.53 (1.20, 1.96)</b>   | 4               |
| Quinolate                     | <b>-0.29</b> | -0.27        | <b>1.62 (1.27, 2.06)</b>   | 4               |
| Kynurenate                    | <b>-0.33</b> | -0.04        | 1.10 (0.90, 1.36)          | 4               |
| 3-hydroxyisobutyrate          | -0.09        | 0.03         | 0.92 (0.74, 1.13)          | 5               |
| Beta-hydroxyisovalerate       | -0.01        | -0.15        | 1.08 (0.87, 1.33)          | 5               |

Hazard ratios are presented per one standard deviation of the metabolite. \*C-mannosyltryptophan is a structurally elucidated compound reported in our study under C-glycosyltryptophan name.

<sup>†</sup> Aggregate of the two forms: asymmetric dimethylarginine/symmetric dimethylarginine.

Legend: r - Spearman non parametric correlation coefficient, HR – hazard ratio, CI – confidence intervals, eGFR – estimated glomerular filtration rate

SUPPLEMENTARY DATA

**Supplementary Table S3.** Clinical characteristics of the auxiliary study group stratified by outcome. Legend: ESRD – End Stage Renal Disease, HbA1c – Hemoglobin, ACR – albumincreatinine ratio, eGFR – estimated glomerular filtration rate.

|                                                | Non progressors<br>(n=39) | ESRD progressors<br>(n=21) | Significance<br>p value |
|------------------------------------------------|---------------------------|----------------------------|-------------------------|
| <u>At baseline:</u>                            |                           |                            |                         |
| Male (%)                                       | 23 (59%)                  | 12 (57%)                   | 0.89                    |
| Age (yr)                                       | 35±8                      | 32±5                       | 0.17                    |
| Duration of diabetes (yr)                      | 25±8                      | 19±7                       | 0.007                   |
| Body mass index (kg/m <sup>2</sup> )           | 26±5                      | 26±4                       | 0.93                    |
| HbA1c (%)                                      | 8.8±1.6                   | 9.9±1.3                    | 0.08                    |
| HbA1c (mmol/l)                                 | 73±18                     | 85±14                      | 0.08                    |
| Serum cholesterol (mg/dl)                      | 200±36                    | 228±57                     | 0.02                    |
| Systolic blood pressure (mmHg)                 | 133±21                    | 129±20                     | 0.47                    |
| Diastolic blood pressure (mmHg)                | 78±11                     | 82±8                       | 0.15                    |
| Antihypertensive/reno-protective               |                           |                            |                         |
| Treatment (%)                                  | 74                        | 52                         | 0.08                    |
| ACR (µg/g creatinine)                          | 665 (445,1297)            | 1243 (850,2000)            | 0.01                    |
| eGFR (ml/min/1.73m <sup>2</sup> )              | 89±27                     | 81±21                      | 0.22                    |
| <u>Follow up</u>                               |                           |                            |                         |
| annual eGFR slope (ml/min/1.73m <sup>2</sup> ) | -1.6 (-2.5 - -0.9)        | -10.9 (-16.6 - -7.6)       | <.0001                  |
| ESRD occurrence (%)                            | 0                         | 100                        | by design               |

## SUPPLEMENTARY DATA

### References:

1. Sekula P, Goek ON, Quaye L, Barrios C, Levey AS, Romisch-Margl W, Menni C, Yet I, Gieger C, Inker LA, Adamski J, Gronwald W, Illig T, Dettmer K, Krumsiek J, Oefner PJ, Valdes AM, Meisinger C, Coresh J, Spector TD, Mohny RP, Suhre K, Kastenmuller G, Kottgen A: A Metabolome-Wide Association Study of Kidney Function and Disease in the General Population. *J Am Soc Nephrol*. 2015. pii: ASN.2014111099
2. Niewczas MA, Sirich TL, Mathew AV, Skupien J, Mohny RP, Warram JH, Smiles A, Huang X, Walker W, Byun J, Karoly ED, Kensicki EM, Berry GT, Bonventre JV, Pennathur S, Meyer TW, Krolewski AS: Uremic solutes and risk of end-stage renal disease in type 2 diabetes: metabolomic study. *Kidney Int* 85:1214-1224, 2014
3. Looker HC, Colombo M, Hess S, Brosnan MJ, Farran B, Dalton RN, Wong MC, Turner C, Palmer CN, Nogoceke E, Groop L, Salomaa V, Dunger DB, Agakov F, McKeigue PM, Colhoun HM: Biomarkers of rapid chronic kidney disease progression in type 2 diabetes. *Kidney Int* 2015 10.1038/ki.2015.199
4. Rhee EP, Clish CB, Ghorbani A, Larson MG, Elmariah S, McCabe E, Yang Q, Cheng S, Pierce K, Deik A, Souza AL, Farrell L, Domos C, Yeh RW, Palacios I, Rosenfield K, Vasani RS, Florez JC, Wang TJ, Fox CS, Gerszten RE: A combined epidemiologic and metabolomic approach improves CKD prediction. *J Am Soc.Nephrol*. 24:1330-1338, 2013
5. Sharma K, Karl B, Mathew AV, Gangoiti JA, Wassel CL, Saito R, Pu M, Sharma S, You YH, Wang L, Diamond-Stanic M, Lindenmeyer MT, Forsblom C, Wu W, Ix JH, Ideker T, Kopp JB, Nigam SK, Cohen CD, Groop PH, Barshop BA, Natarajan L, Nyhan WL, Naviaux RK: Metabolomics reveals signature of mitochondrial dysfunction in diabetic kidney disease. *J Am Soc.Nephrol*. 24:1901-1912, 2013

SUPPLEMENTARY DATA

**Supplementary Figure S1.** Systemic levels and the renal clearance of 4 metabolites measured in main and auxiliary studies according to the risk of nephropathy progression. Crude and adjusted hazard ratios for the progression to ESRD of the metabolites are presented per one standard deviation of the metabolite. Legend: HR – hazard ratio, CI – confidence intervals.

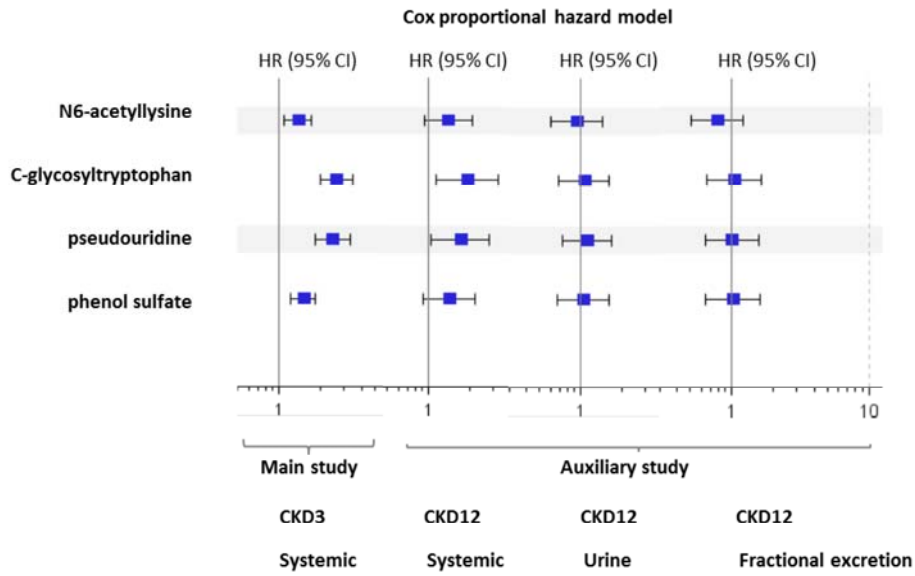



## SUPPLEMENTARY DATA

### Supplementary Results – Protein acetylation

***Quantification of protein-bound acetyl-lysine residues.*** Protein-bound acetyl-lysine residues were quantified by LC/ESI/MS/MS (31) in the 40 samples balanced by caseness in Dr.Pennathur's laboratory (University of Michigan). Briefly, plasma proteins were precipitated with ice-cold 10% trichloroacetic acid and delipidated with water/methanol/water-saturated diethyl ether (1:3:7; vol/vol/vol). Known amounts of isotope-labeled internal standards were added. The precipitated proteins were hydrolyzed at 110°C for overnight in 6M hydrochloric acid, dried and dissolved in 50% methanol. For LC/ESI/MS/MS analysis, an Agilent 6410 triple quadruple MS system equipped with an Agilent 1200 LC system and ESI source was operated in positive ion mode. Acetyl-lysine, lysine, and the isotope-labeled standards were detected in the multiple reaction monitoring (MRM) mode and relative peak areas were obtained.

***Free versus protein-bound N6-acetyllysine residues.*** Free N6-acetyllysine (derived from the global profiling) has been identified among top 9 modified metabolites significantly associated with the eGFR decline. An important source of free acetyllysine could be proteolysis of acetylated proteins. We compared whether free acetyllysine reflected the pattern of circulating protein acetylation at the global level by mass spectrometry. Protein-bound N6-acetyllysine residues did not correlate with free circulating N6-acetyllysine ( $r=0.21$ ) nor with the eGFR slope ( $r=0.05$ ).
